# Supplementary material for: Solution-processed amorphous hafnium-lanthanum oxide gate insulator for oxide thin-film transistors
Source: Royal Society of Chemistry journal article supplement (doi:10.1039/c3tc31727g), 2013-10-26
Supplement: c3tc31727g.pdf [file c3tc31727g.pdf]

*(Supplementary Information)*

**Solution-Processed Amorphous Hafnium-Lanthanum  
Oxide Gate Insulator for Oxide Thin-Film Transistors**

Jieun Ko,<sup>a</sup> Joohee Kim,<sup>a</sup> Si Yun Park,<sup>a</sup> Eungkyu Lee,<sup>a</sup> Kyongjun Kim,<sup>a</sup> Keon-  
Hee Lim,<sup>a</sup> and Youn Sang Kim<sup>a,b\*</sup>

<sup>a</sup> Program in Nano Science and Technology, Graduate School of Convergence  
Science and Technology, Seoul National University Seoul 151-744, Republic of  
Korea, Fax: +82-31-888-9148; Tel: +82-33-888-9131; E-mail:  
[younskim@snu.ac.kr](mailto:younskim@snu.ac.kr),

<sup>b</sup> Advanced institute of convergence technology, 864-1 Iui-dong, Yeongtong-gu,  
Suwon-si, Gyeonggi-do 443-72, Republic of Korea

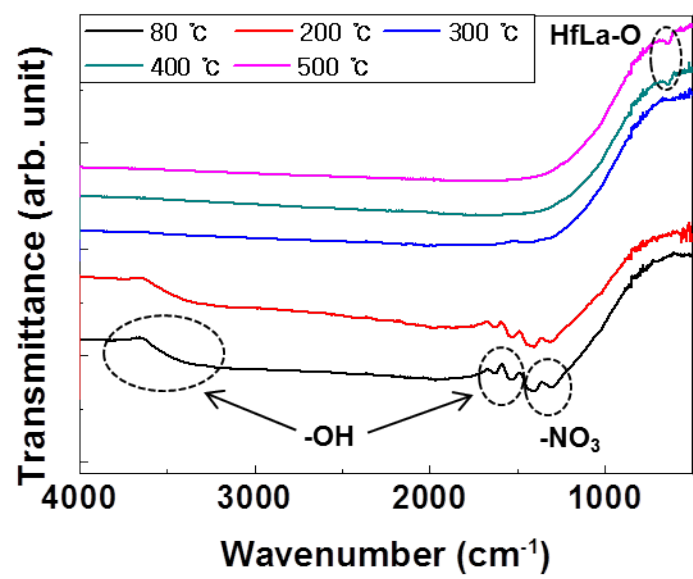

**Fig. S1** ATR-FT IR spectroscopy of the HfLaO<sub>x</sub> films at different temperatures.

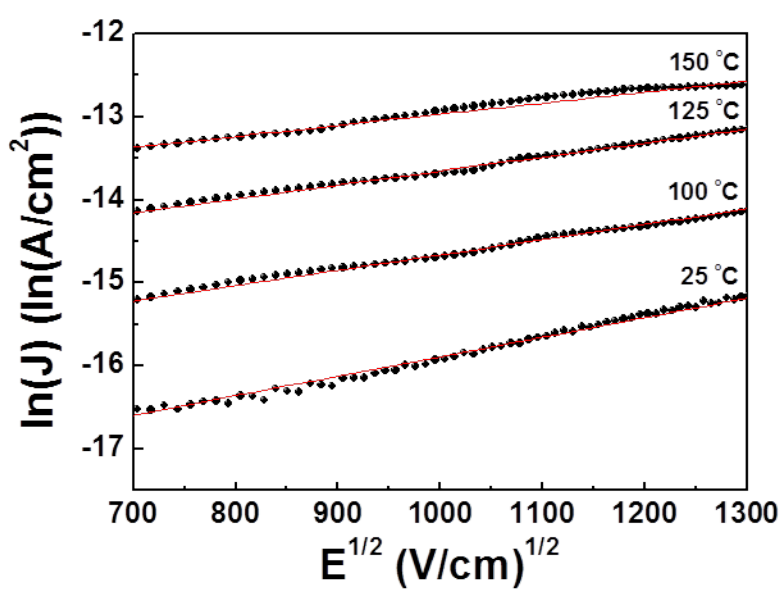

**Fig. S2** The ln(J) versus E<sup>1/2</sup> plots for HfLaO<sub>x</sub> films were measured at various temperature ranges.

The solid line shows the linearly fitted graphs by thermionic emission model. To figure out the conduction mechanism of HfLaO<sub>x</sub> film, additional experiments were carried out. We

checked the temperature dependency of HfLaO<sub>x</sub> films' leakage current density and matched it with various conduction mechanisms in MIS capacitors. As a result, thermionic emission model could explain the conduction mechanism of the HfLaO<sub>x</sub> films as shown in the above figure.

#### Thermionic emission model;

$$J = A^{**}T^2 \exp\left[\frac{-q(\phi_B - \sqrt{\frac{q\epsilon_i}{4\pi\epsilon_i}})}{kT}\right]$$

**$A^{**}$  = effective Richardson constant.  $\phi_B$  = barrier height.  $\epsilon_i$  = electric field in insulator.**

**$\epsilon_i$  = insulator permittivity.  $\sqrt{\frac{q}{4\pi\epsilon_i}}$  = constants. <sup>1)</sup>**

Thermionic emission is responsible for carrier transport between the metal-insulator barrier or the insulator-semiconductor barrier. In the increment of temperature in metal, the electrons would be moving faster and some could escape from their bulk. We don't fully understand why these films show the thermionic emission but we carefully suggest that the existence of native oxide between silicon substrate and HfLaO<sub>x</sub> dielectric film made the oxide barrier and led thermionic emission.

In the other previous report (C. An, M. S. Lee, J. Choi, and H. Kim, *Appl. Phys., Lett.* 2009, 94, 262901), the ALD deposited HfLaO<sub>x</sub> films were shown to follow the Poole-Frenkel emission model. It is interesting that two results were shown different conduction mechanism. However, in this study, we just showed that the thermionic emission model could explain the electrical conduction of solution-processed HfLaO<sub>x</sub> dielectric films. We remain the detail study of conduction mechanism as a further study.

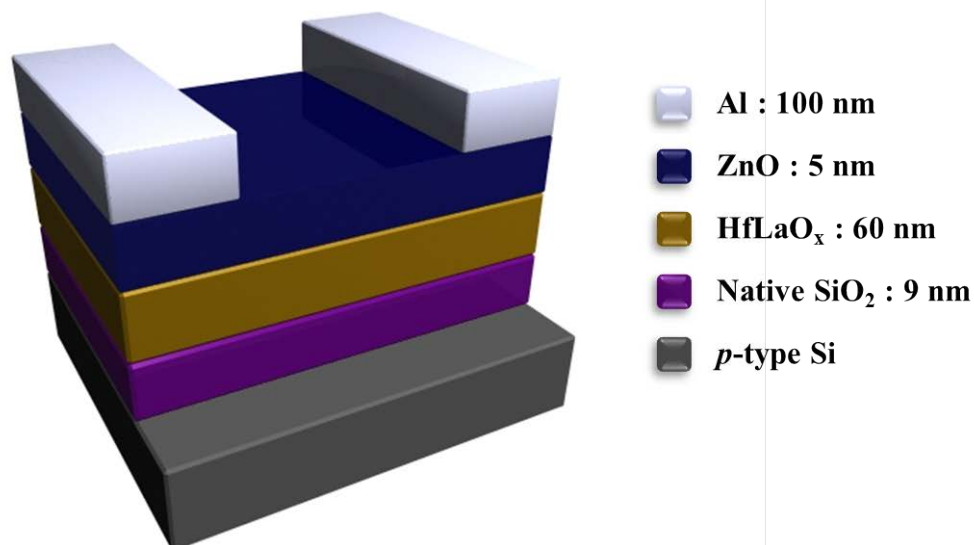

**Fig. S3** ZnO TFT device structure with HfLaO<sub>x</sub> as a dielectric layer.

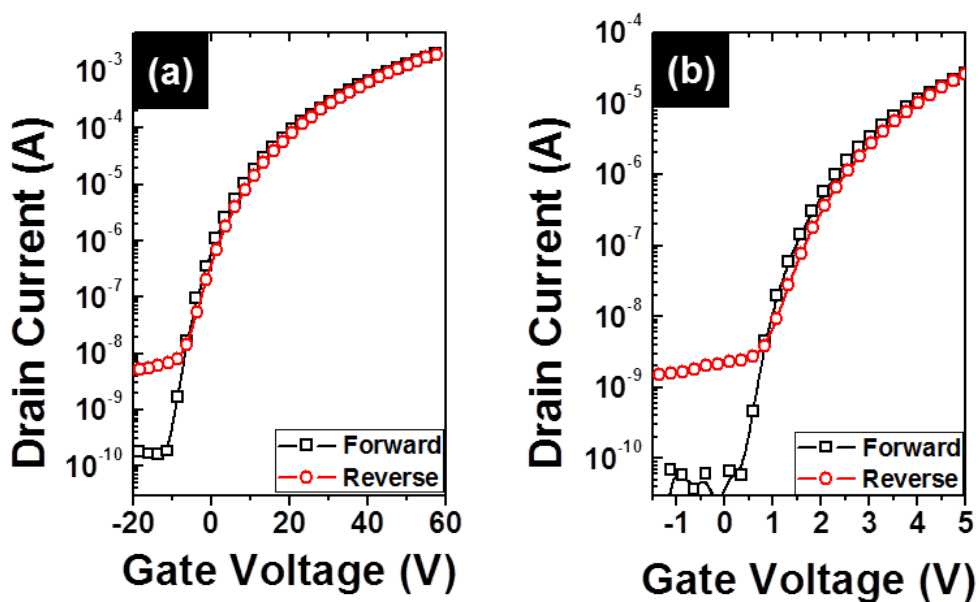

**Fig. S4** Hysteresis of Li-ZnO TFTs on (a) 200 nm SiO<sub>2</sub> and (b) HfLaO<sub>x</sub> gate insulator.

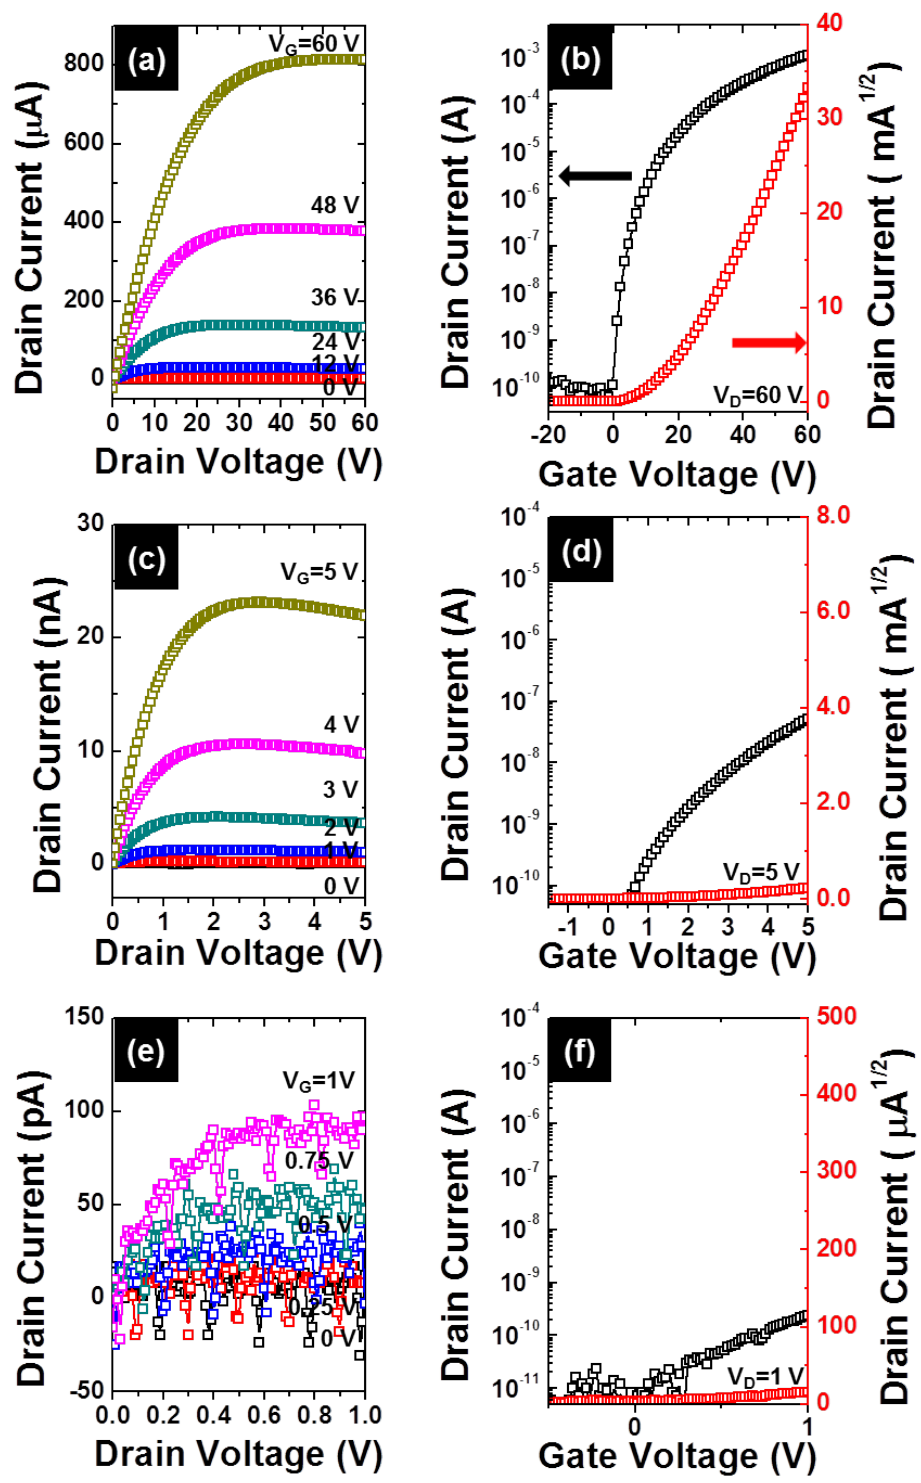

**Fig. S5** Output and transfer characteristics of ZnO TFTs with 200 nm SiO<sub>2</sub> gate insulator. (*p*-type Si / 200 nm SiO<sub>2</sub> / 5 nm ZnO / 100 nm Al) ((a), (b):  $V_{DS}$ ,  $V_{GS} = 60$  V, (c), (d):  $V_{DS}$ ,  $V_{GS} = 5$  V, (e),(f):  $V_{DS}$ ,  $V_{GS} = 1$  V)

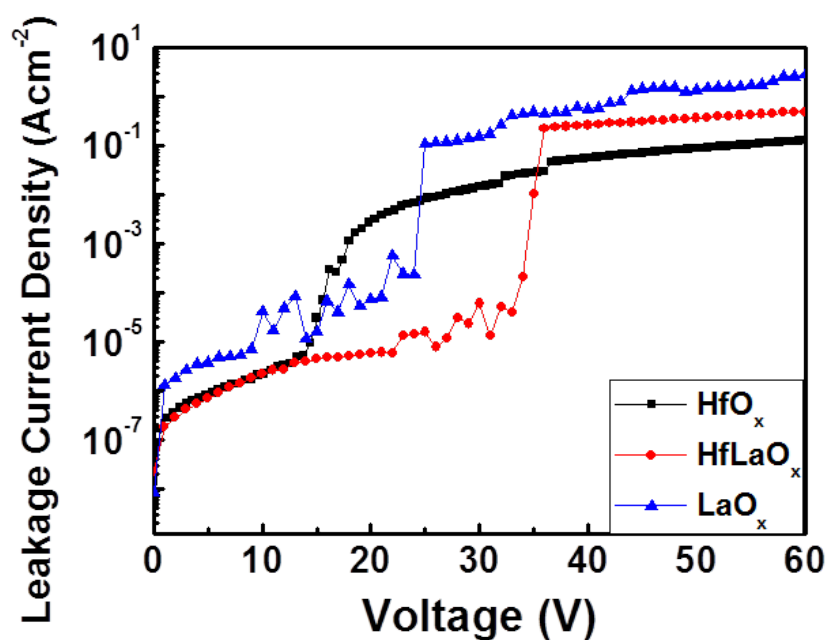

**Fig. S6** Leakage current density versus voltage of metal oxide films measured with metal-insulator-metal structure. (*p*-type Si substrate as bottom electrode / metal oxide dielectric layer / aluminium top electrode).

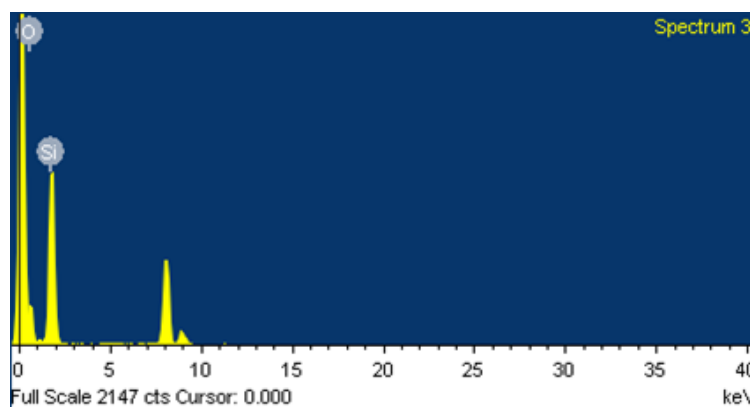

**Fig. S7** Energy-dispersive X-ray spectroscopy (EDX) results of a SiO<sub>2</sub> interlayer (SiO<sub>2</sub> layer in Figure 5(a))
